# Supplementary material
Source: PubMed Central journal article supplement (PMC5860966)
Supplement: NIHMS936510-supplement-1.pdf [file NIHMS936510-supplement-1.pdf]

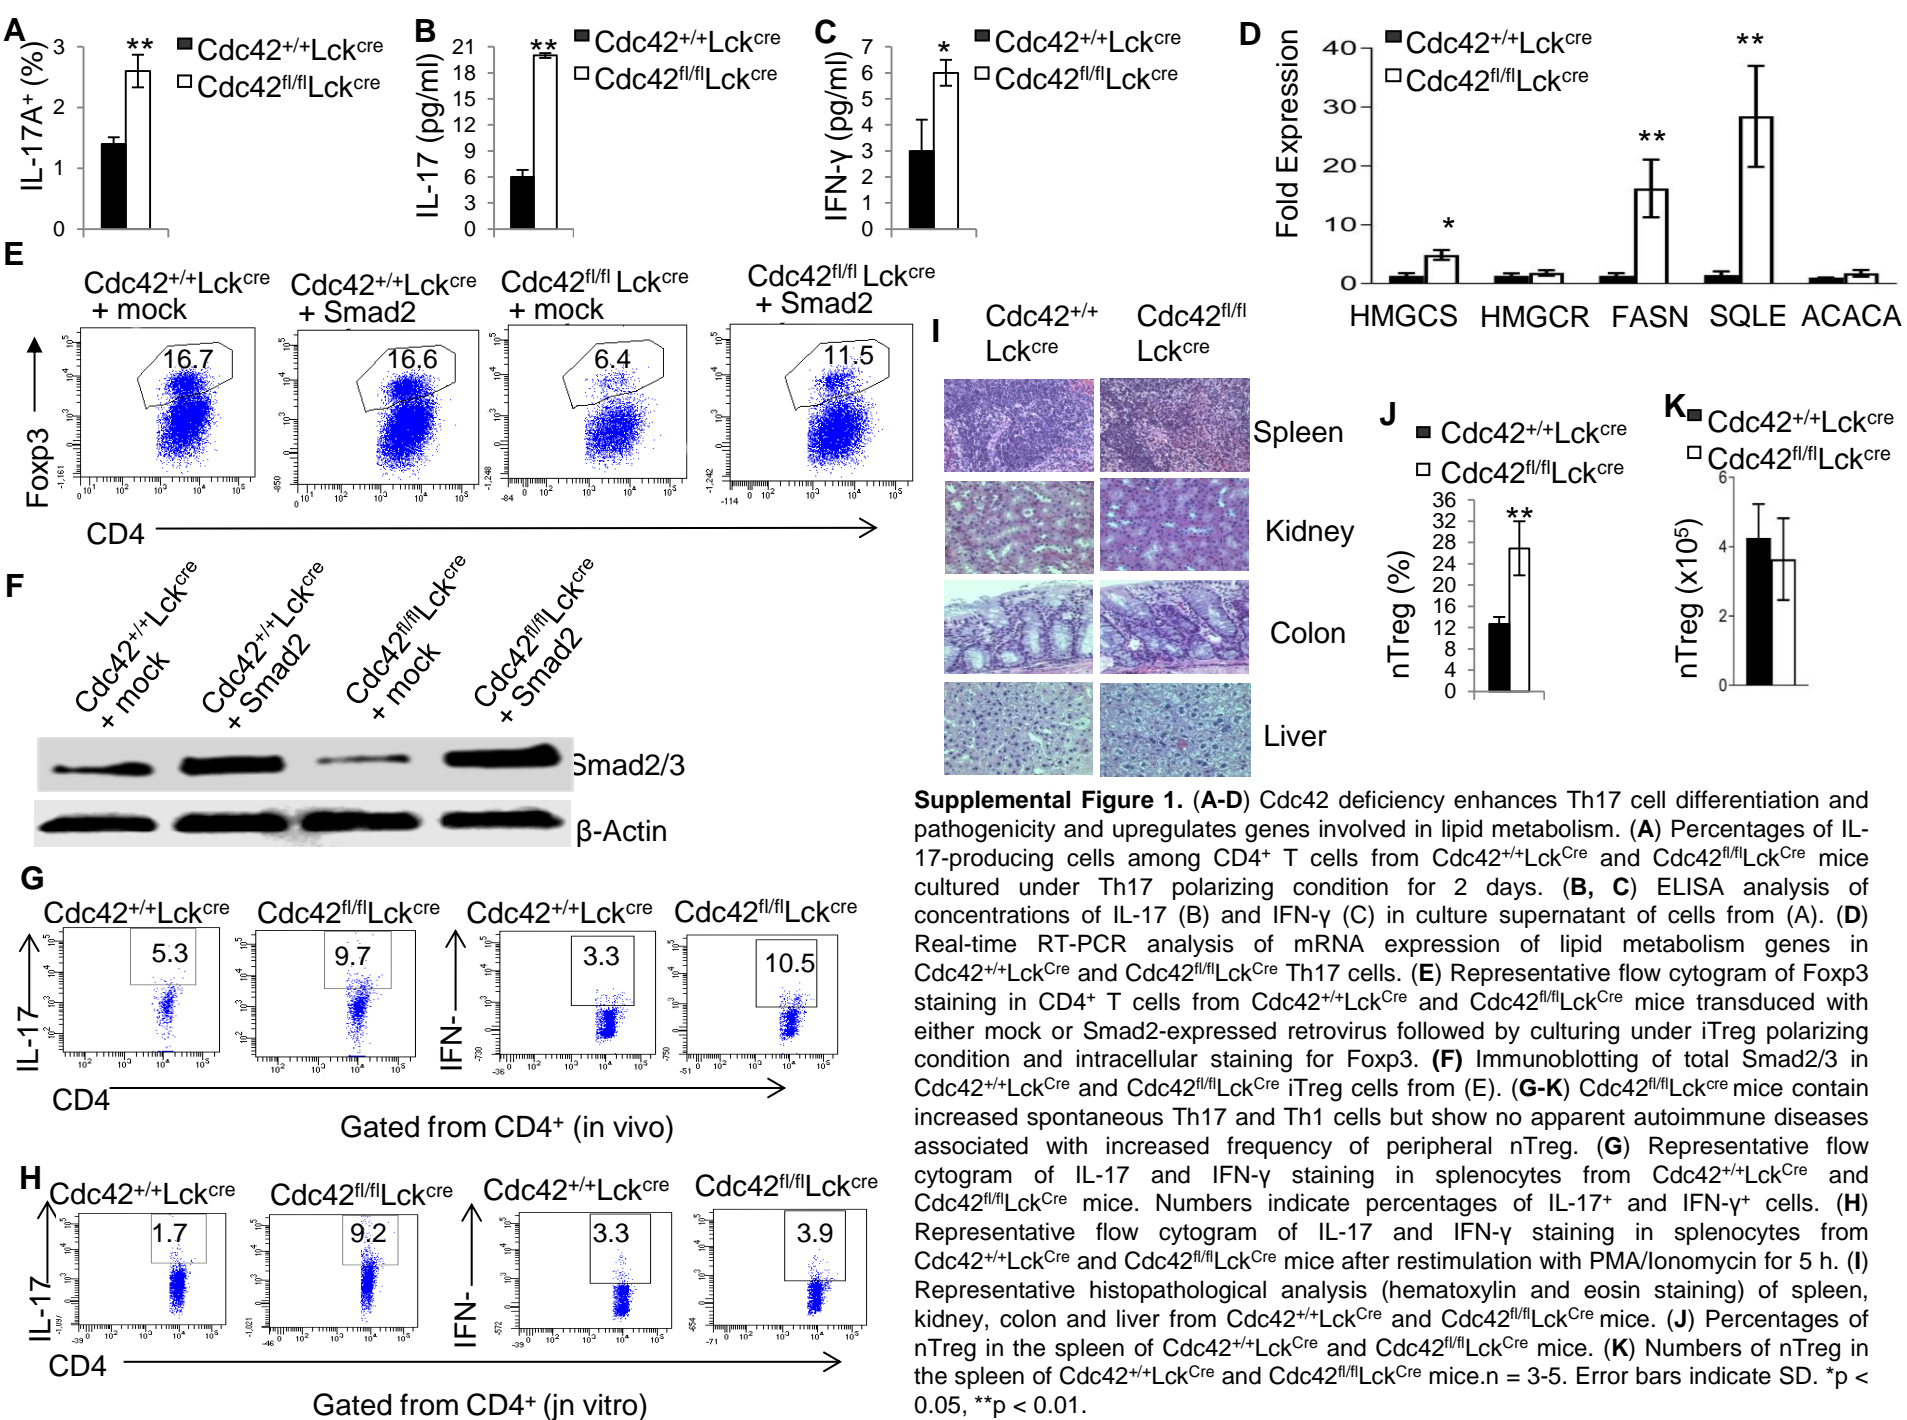

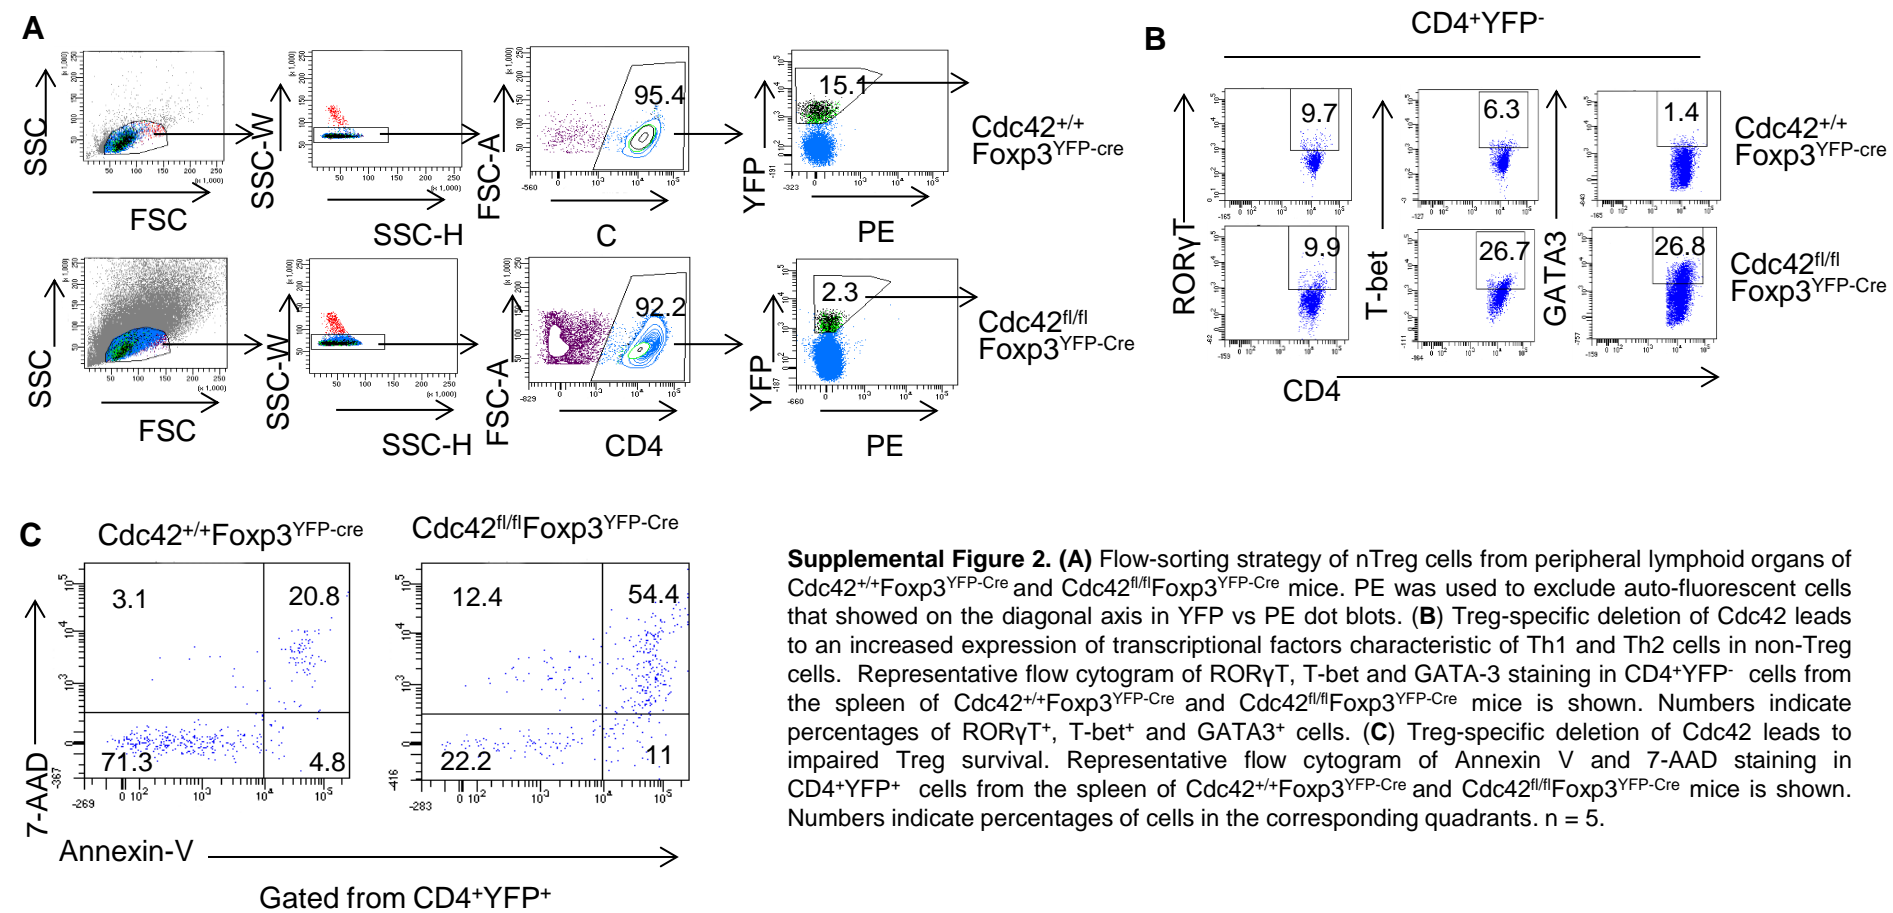

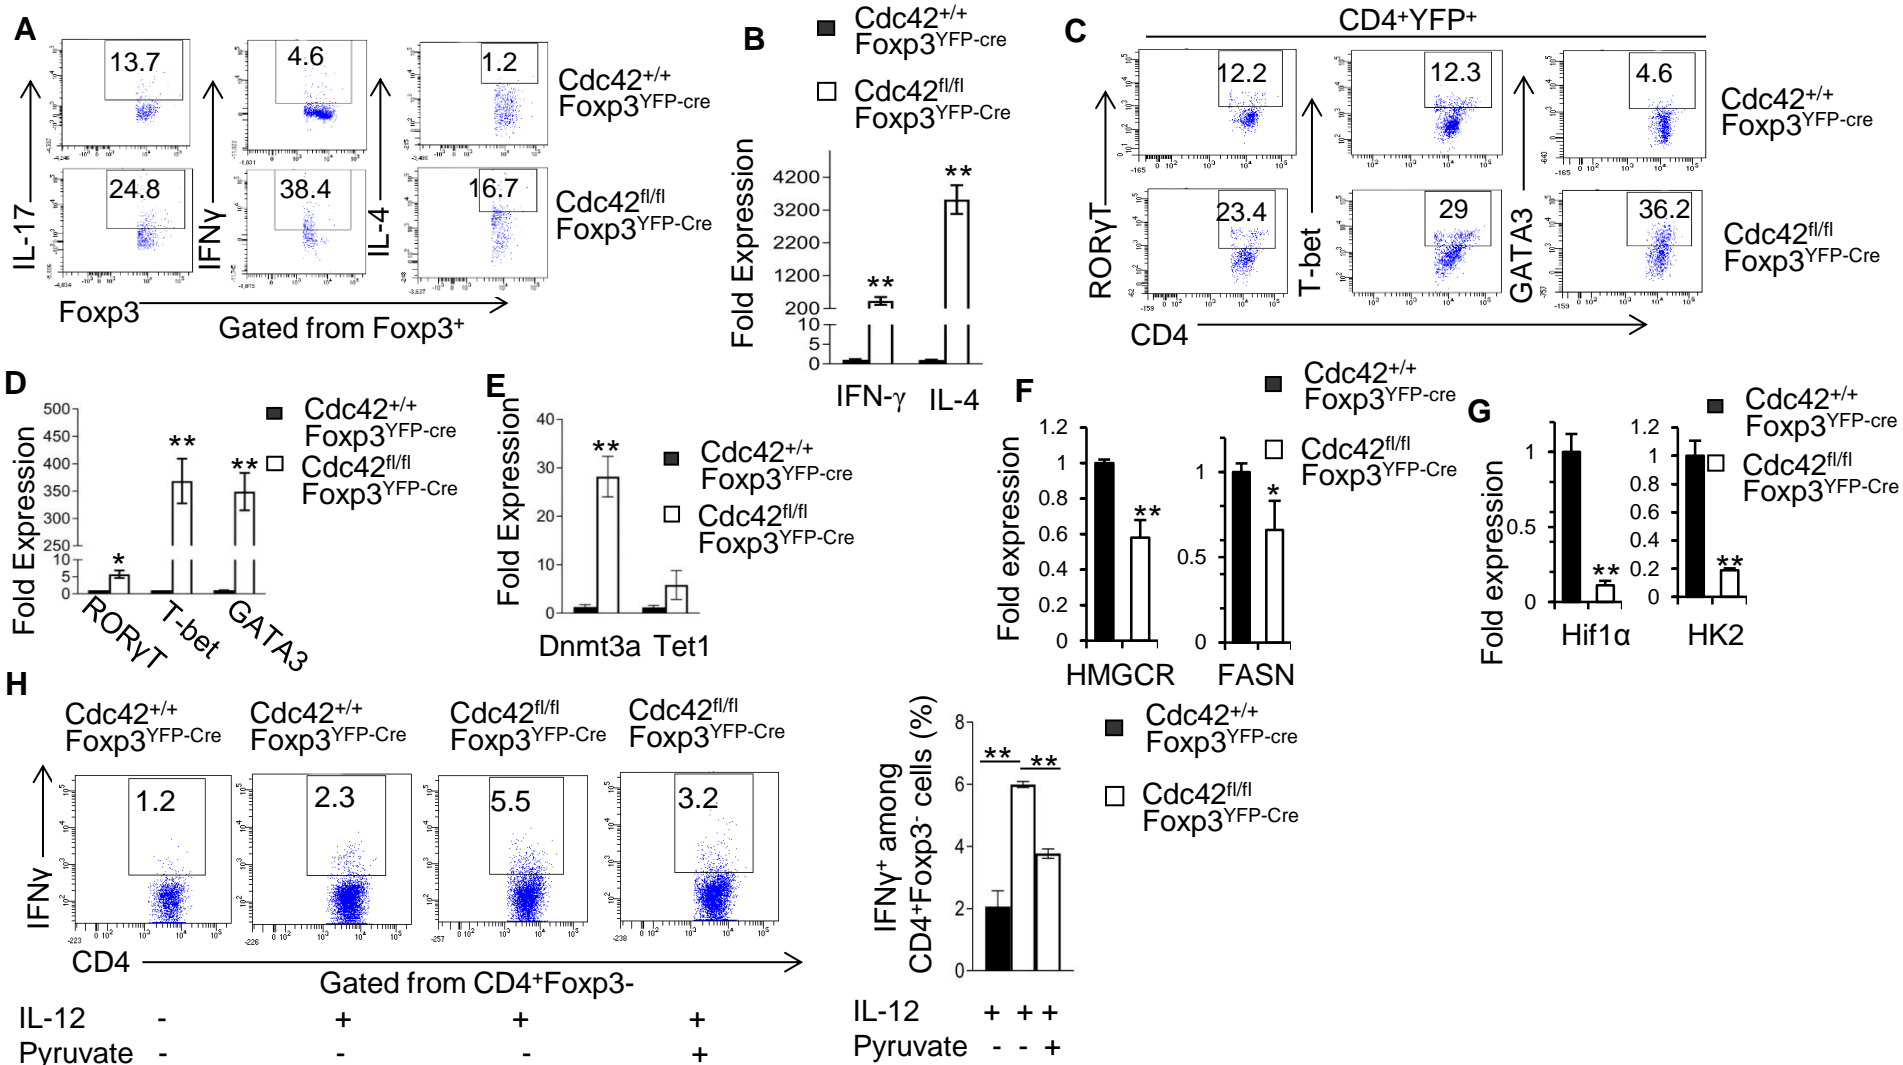

**Supplemental Figure 3. (A-E)** Treg-specific deletion of *Cdc42* leads to Treg instability. **(A)** Representative flow cytogram of staining of IL-17, IFN- $\gamma$  and IL-4 among Fopx3<sup>+</sup> cells from the spleen of *Cdc42*<sup>+/+</sup>*Fopx3*<sup>YFP-Cre</sup> and *Cdc42*<sup>fl/fl</sup>*Fopx3*<sup>YFP-Cre</sup> mice. **(B)** Real-time RT-PCR analysis of mRNA expression of IFN- $\gamma$  and IL-4 in CD4<sup>+</sup>YFP<sup>+</sup> cells from the spleen of *Cdc42*<sup>+/+</sup>*Fopx3*<sup>YFP-Cre</sup> and *Cdc42*<sup>fl/fl</sup>*Fopx3*<sup>YFP-Cre</sup> mice. **(C)** Representative flow cytogram of ROR $\gamma$ T, T-bet and GATA-3 staining in CD4<sup>+</sup>YFP<sup>+</sup> cells from the spleen of *Cdc42*<sup>+/+</sup>*Fopx3*<sup>YFP-Cre</sup> and *Cdc42*<sup>fl/fl</sup>*Fopx3*<sup>YFP-Cre</sup> mice. **(D)** Real-time RT-PCR analysis of mRNA expression of ROR $\gamma$ T, T-bet and GATA-3 in CD4<sup>+</sup>YFP<sup>+</sup> cells from the spleen of *Cdc42*<sup>+/+</sup>*Fopx3*<sup>YFP-Cre</sup> and *Cdc42*<sup>fl/fl</sup>*Fopx3*<sup>YFP-Cre</sup> mice. **(E)** Real-time RT-PCR analysis of mRNA expression of DNMT3A and TET1 in CD4<sup>+</sup>YFP<sup>+</sup> cells from the spleen of *Cdc42*<sup>+/+</sup>*Fopx3*<sup>YFP-Cre</sup> and *Cdc42*<sup>fl/fl</sup>*Fopx3*<sup>YFP-Cre</sup> mice. **(F-H)** Treg-specific deletion of *Cdc42* downregulates lipid metabolism and glycolysis genes in nTreg cells and restoration of glycolysis rescues instability of *Cdc42*-deficient nTreg. **(F)** Real-time RT-PCR analysis of mRNA expression of lipid metabolism genes HMGCR and FASN in CD4<sup>+</sup>Fopx3<sup>+</sup> cells from the spleen of *Cdc42*<sup>+/+</sup>*Fopx3*<sup>YFP-Cre</sup> and *Cdc42*<sup>fl/fl</sup>*Fopx3*<sup>YFP-Cre</sup> mice. **(G)** Real-time RT-PCR analysis of mRNA expression of glycolysis genes Hif1 $\alpha$  and HK2 in CD4<sup>+</sup>Fopx3<sup>+</sup> cells from the spleen of *Cdc42*<sup>+/+</sup>*Fopx3*<sup>YFP-Cre</sup> and *Cdc42*<sup>fl/fl</sup>*Fopx3*<sup>YFP-Cre</sup> mice. **(H)** CD4<sup>+</sup>CD25<sup>+</sup>YFP<sup>+</sup> nTreg cells purified from *Cdc42*<sup>+/+</sup>*Fopx3*<sup>YFP-Cre</sup> and *Cdc42*<sup>fl/fl</sup>*Fopx3*<sup>YFP-Cre</sup> mice were cultured for 36 h with or without anti-CD3/-CD28 and IL-12 (50 ng/ml), in the presence or absence of 2 mM pyruvate, and costained for CD4, Fopx3, and IFN- $\gamma$ . Representative flow cytogram of IFN- $\gamma$  staining among CD4<sup>+</sup>Fopx3<sup>+</sup> cells is shown (left). Numbers in the dot plots indicate percentages of IFN- $\gamma$ <sup>+</sup> cells. Average percentages of CD4<sup>+</sup>Fopx3<sup>+</sup>IFN- $\gamma$ <sup>+</sup> cells are shown in bar graph (right). n = 5. Error bars indicate SD. \*p < 0.05, \*\*p < 0.01.

**A**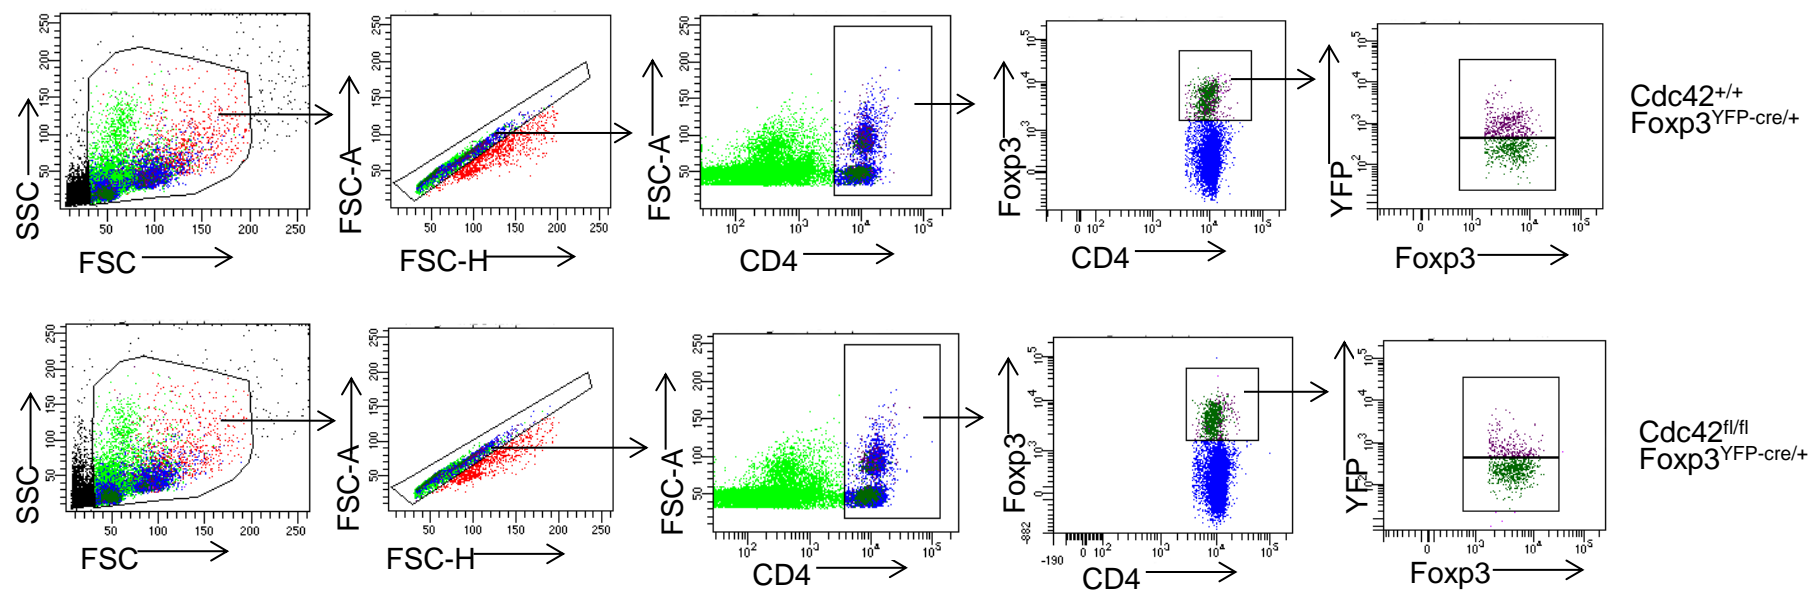**B**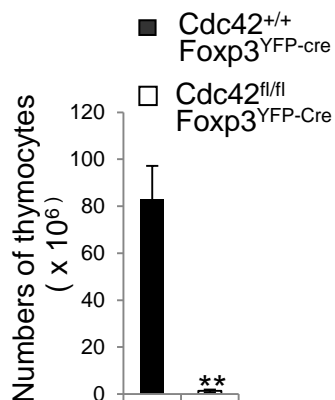**C**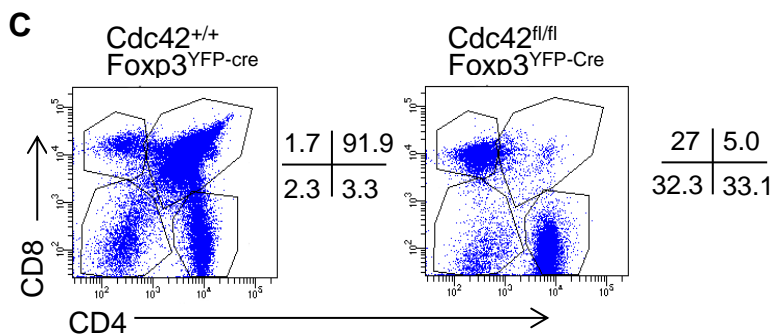**D**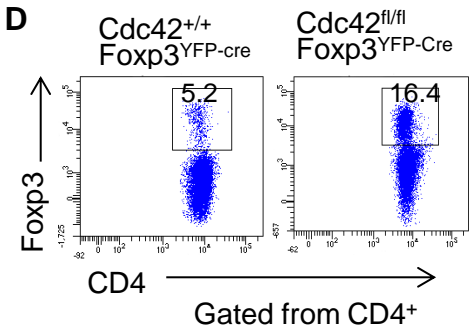

**Supplemental Figure 4. (A)** Gating strategy of Foxp3<sup>+</sup>YFP<sup>+</sup> and Foxp3<sup>+</sup>YFP<sup>-</sup> cells from the spleen of Cdc42<sup>+/+</sup>Foxp3<sup>YFP-Cre/+</sup> and Cdc42<sup>fl/fl</sup>Foxp3<sup>YFP-Cre/+</sup> mice. **(B)** Total thymocyte numbers in Cdc42<sup>+/+</sup>Foxp3<sup>YFP-Cre</sup> and Cdc42<sup>fl/fl</sup>Foxp3<sup>YFP-Cre</sup> mice. **(C)** Representative flow cytogram of thymocytes from Cdc42<sup>+/+</sup>Foxp3<sup>YFP-Cre</sup> and Cdc42<sup>fl/fl</sup>Foxp3<sup>YFP-Cre</sup> mice stained for CD4 and CD8. Numbers indicate percentages of CD4<sup>-</sup>CD8<sup>+</sup>, CD4<sup>+</sup>CD8<sup>+</sup>, CD4<sup>+</sup> and CD8<sup>+</sup> cells in corresponding quadrant. **(D)** Representative flow cytogram of Foxp3 staining (gated on CD4<sup>+</sup> thymocytes) in thymocytes from Cdc42<sup>+/+</sup>Foxp3<sup>YFP-Cre</sup> and Cdc42<sup>fl/fl</sup>Foxp3<sup>YFP-Cre</sup> mice. Numbers indicate percentages of CD4<sup>+</sup>Foxp3<sup>+</sup> cells. n = 5. Error bars indicate SD. \*\*p < 0.01.
